# Supplementary material for: Cerebrovascular Events after Transcatheter Aortic Valve Replacement: The Difficulty in Predicting the Unpredictable
Source: MDPI journal article supplement (doi:10.3390/jcm11133902), 2022-07-04
Supplement: s1 [file s1]

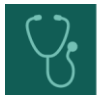

## Supplementary Materials

**Figure S1.** Modified CONSORT diagram of the derivation cohort.

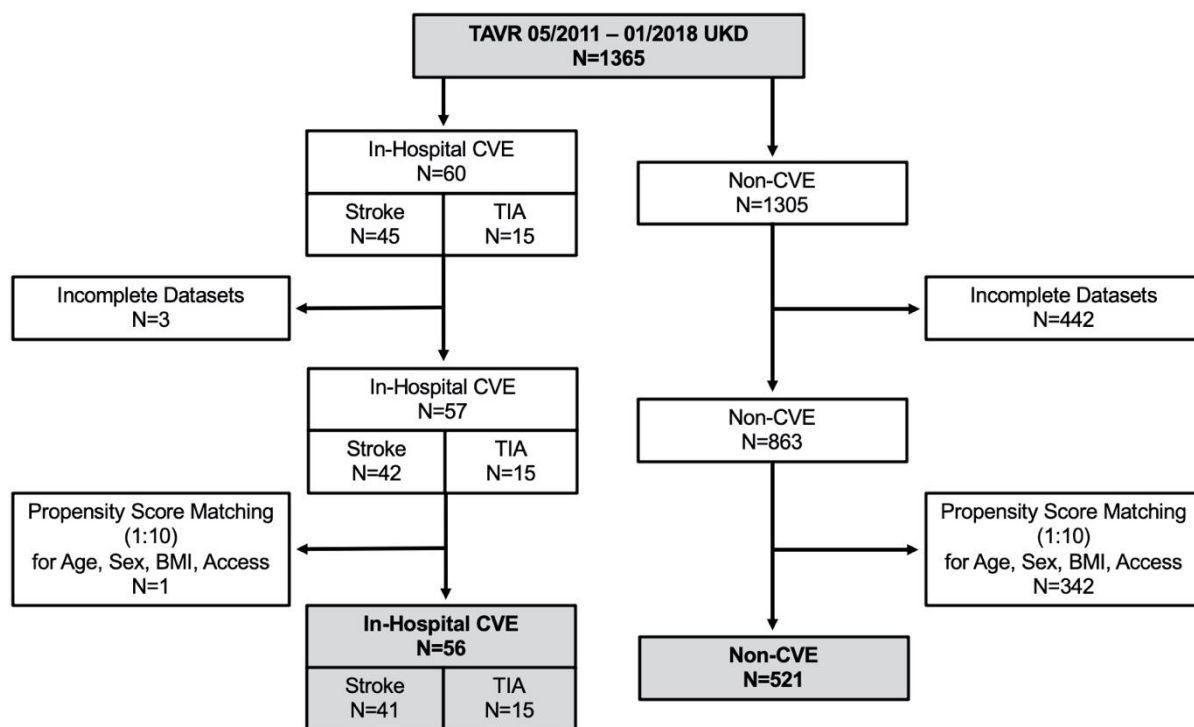

BMI = Body mass index, CVE = Cerebrovascular event, TAVR = Transcatheter aortic valve replacement, TIA = Transient ischemic attack.

**Figure S2.** Modified CONSORT diagram of the validation cohort.

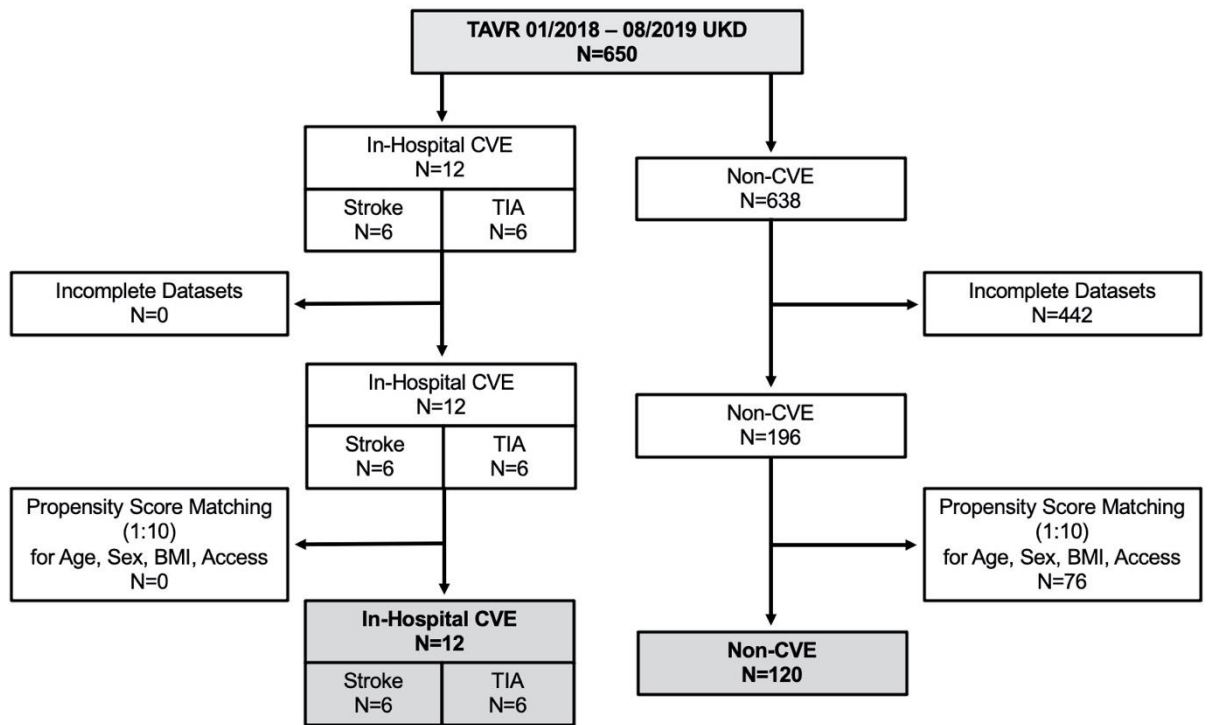

BMI = Body mass index, CVE = Cerebrovascular event, TAVR = Transcatheter aortic valve replacement, TIA = Transient ischemic attack.

**Table S1.** Patients' baseline characteristics of the derivation cohort.

|                                                               | All patients<br>(n=577) | Non-CVE<br>group<br>(n=521) | CVE<br>group<br>(n=56) | <i>p</i> -Value |
|---------------------------------------------------------------|-------------------------|-----------------------------|------------------------|-----------------|
| Age (years), Mean $\pm$ SD                                    | 82.2 $\pm$ 5.2          | 82.1 $\pm$ 5.2              | 82.6 $\pm$ 4.8         | 0.469           |
| Female, n (%)                                                 | 325 (56.3)              | 292 (56.0)                  | 33 (58.9)              | 0.679           |
| BMI (kg/m <sup>2</sup> ), Mean $\pm$ SD                       | 26.9 $\pm$ 5.1          | 26.9 $\pm$ 5.1              | 26.8 $\pm$ 4.9         | 0.896           |
| NYHA class III/IV,<br>n (%)                                   | 442 (76.6)              | 400 (76.8)                  | 42 (75.0)              | 0.766           |
| CCS class III/IV, n (%)                                       | 97 (16.8)               | 87 (16.7)                   | 10 (17.9)              | 0.826           |
| Diabetes mellitus, n (%)                                      | 145 (25.1)              | 132 (25.3)                  | 13 (23.2)              | 0.728           |
| COPD, n (%)                                                   | 173 (30.0)              | 158 (30.3)                  | 15 (26.8)              | 0.583           |
| Arterial hypertension,<br>n (%)                               | 549 (95.1)              | 496 (95.2)                  | 53 (94.6)              | 0.853           |
| Atrial fibrillation, n (%)                                    | 188 (32.6)              | 169 (32.4)                  | 19 (33.9)              | 0.821           |
| Pulmonary hypertension,<br>n (%)                              | 406 (70.4)              | 367 (70.4)                  | 39 (69.6)              | 0.901           |
| CAD, n (%)                                                    | 430 (74.5)              | 391 (75.0)                  | 39 (69.6)              | 0.378           |
| PAD, n (%)                                                    | 183 (31.7)              | 163 (31.3)                  | 20 (35.7)              | 0.499           |
| CVD, n (%)                                                    | 105 (18.2)              | 91 (17.5)                   | 14 (25.0)              | 0.165           |
| Prior CVE, n (%)                                              | 55 (9.9)                | 45 (8.6)                    | 10 (17.9)              | 0.026*          |
| GFR (<50 mL/min),<br>n (%)                                    | 247 (42.8)              | 221 (42.4)                  | 26 (46.4)              | 0.564           |
| EuroSCORE II (%),<br>Mean $\pm$ SD                            | 8.2 $\pm$ 8.5           | 8.2 $\pm$ 8.3               | 8.9 $\pm$ 10.5         | 0.557           |
| STS score (%), Mean $\pm$ SD                                  | 7.6 $\pm$ 6.9           | 7.6 $\pm$ 7.1               | 7.6 $\pm$ 5.2          | 0.935           |
| HR (log.ES $\geq$ 20%), n (%)                                 | 332 (57.5)              | 294 (56.4)                  | 38 (67.9)              | 0.100           |
| HAS-BLED Score,<br>Mean $\pm$ SD                              | 3.5 $\pm$ 0.9           | 3.5 $\pm$ 0.9               | 3.7 $\pm$ 0.9          | 0.048*          |
| CHA <sub>2</sub> DS <sub>2</sub> VASc Score,<br>Mean $\pm$ SD | 4.8 $\pm$ 1.2           | 4.8 $\pm$ 1.2               | 5.2 $\pm$ 1.1          | 0.009**         |
| OAC, n (%)                                                    | 167 (28.9)              | 155 (29.8)                  | 12 (21.4)              | 0.218           |
| NOAC, n (%)                                                   | 56 (9.7)                | 49 (9.4)                    | 7 (12.5)               | 0.429           |
| SAPT, n (%)                                                   | 221 (38.3)              | 200 (38.4)                  | 21 (37.5)              | 0.976           |
| DAPT, n (%)                                                   | 99 (17.2)               | 88 (16.9)                   | 11 (19.6)              | 0.561           |
| LVEF (%), Mean $\pm$ SD                                       | 50.0 $\pm$ 13.9         | 50.3 $\pm$ 13.9             | 47.1 $\pm$ 14.3        | 0.421           |
| PA sys (>50mmHg), n (%)                                       | 51 (8.8)                | 49 (9.4)                    | 2 (3.6)                | 0.250           |
| Hospital stay (days), Mean $\pm$<br>SD                        | 11.6 $\pm$ 8.1          | 10.9 $\pm$ 6.8              | 18.7 $\pm$ 14.1        | <0.001***       |

Values are mean  $\pm$  SD or n (%). Parameters are shown with *p*-values (\**p*<0.05, \*\**p*<0.01, \*\*\**p*<0.001). BMI = Body mass index, CAD = Coronary artery disease, CCS = Canadian Cardiovascular Society, COPD = Chronic obstructive pulmonary disease, CVD = Cerebrovascular disease, CVE = Cerebrovascular event, DAPT = Dual antiplatelet therapy, GFR = Glomerular filtration rate, HR = High risk, LVEF = Left ventricular ejection fraction, NOAC = New oral anticoagulation, NYHA = New York

Heart Association, OAC = Oral anticoagulation, PAD = Peripheral vascular disease, PAsys = Systolic pulmonary artery pressure, SAPT = Single antiplatelet therapy, STS = Society of Thoracic Surgeons.

**Table S2.** Patients' characteristics of the validation cohort.

|                                                               | <b>All patients<br/>(n=132)</b> | <b>Non-CVE<br/>group<br/>(n=120)</b> | <b>CVE<br/>group<br/>(n=12)</b> | <b><i>p</i>-Value</b> |
|---------------------------------------------------------------|---------------------------------|--------------------------------------|---------------------------------|-----------------------|
| Age (years), Mean $\pm$ SD                                    | 79.4 $\pm$ 6.7                  | 79.5 $\pm$ 6.6                       | 77.6 $\pm$ 8.2                  | 0.340                 |
| Female, n (%)                                                 | 68 (51.5)                       | 62 (51.7)                            | 6 (50.0)                        | 0.912                 |
| BMI (kg/m <sup>2</sup> ), Mean $\pm$ SD                       | 26.5 $\pm$ 4.8                  | 26.5 $\pm$ 4.9                       | 27.0 $\pm$ 4.1                  | 0.739                 |
| NYHA class III/IV,<br>n (%)                                   | 108 (81.8)                      | 99 (82.5)                            | 9 (75.0)                        | 0.521                 |
| CCS class III/IV, n (%)                                       | 6 (4.5)                         | 5 (4.2)                              | 1 (8.3)                         | 0.509                 |
| Diabetes mellitus, n (%)                                      | 34 (25.8)                       | 30 (25.0)                            | 4 (33.3)                        | 0.529                 |
| COPD, n (%)                                                   | 41 (31.1)                       | 37 (30.8)                            | 4 (33.3)                        | 0.858                 |
| Arterial hypertension,<br>n (%)                               | 118 (89.4)                      | 109 (90.8)                           | 9 (75.0)                        | 0.089                 |
| Atrial fibrillation, n (%)                                    | 50 (37.9)                       | 46 (38.3)                            | 4 (33.3)                        | 0.734                 |
| Pulmonary hypertension,<br>n (%)                              | 71 (53.8)                       | 64 (53.3)                            | 7 (58.3)                        | 0.740                 |
| CAD, n (%)                                                    | 96 (72.7)                       | 89 (74.2)                            | 7 (58.3)                        | 0.240                 |
| PAD, n (%)                                                    | 30 (22.7)                       | 27 (22.5)                            | 3 (25.0)                        | 0.844                 |
| CVD, n (%)                                                    | 21 (15.9)                       | 17 (14.2)                            | 4 (33.3)                        | 0.083                 |
| Prior CVE, n (%)                                              | 22 (16.7)                       | 20 (16.7)                            | 2 (16.7)                        | 1.000                 |
| GFR (<50 mL/min),<br>n (%)                                    | 47 (35.6)                       | 40 (33.3)                            | 7 (58.3)                        | 0.085                 |
| EuroSCORE II (%),<br>Mean $\pm$ SD                            | 5.4 $\pm$ 5.1                   | 5.2 $\pm$ 4.9                        | 7.3 $\pm$ 6.8                   | 0.178                 |
| STS score (%), Mean $\pm$ SD                                  | 4.5 $\pm$ 3.1                   | 4.5 $\pm$ 2.9                        | 5.0 $\pm$ 5.4                   | 0.600                 |
| HR (log <sub>ES</sub> $\geq$ 20%), n (%)                      | 58 (43.9)                       | 53 (44.2)                            | 5 (41.7)                        | 0.868                 |
| HAS-BLED Score,<br>Mean $\pm$ SD                              | 2.7 $\pm$ 0.9                   | 2.7 $\pm$ 0.9                        | 2.5 $\pm$ 0.8                   | 0.484                 |
| CHA <sub>2</sub> DS <sub>2</sub> VASc Score,<br>Mean $\pm$ SD | 4.7 $\pm$ 1.3                   | 4.7 $\pm$ 1.4                        | 4.3 $\pm$ 1.1                   | 0.373                 |
| OAC, n (%)                                                    | 21 (15.9)                       | 18 (15.0)                            | 3 (25.0)                        | 0.367                 |
| NOAC, n (%)                                                   | 34 (25.8)                       | 32 (26.7)                            | 2 (16.7)                        | 0.450                 |
| SAPT, n (%)                                                   | 39 (29.5)                       | 34 (28.3)                            | 5 (41.7)                        | 0.334                 |
| DAPT, n (%)                                                   | 32 (24.2)                       | 28 (23.3)                            | 4 (33.3)                        | 0.441                 |
| LVEF (%), Mean $\pm$ SD                                       | 53.4 $\pm$ 12.9                 | 53.7 $\pm$ 13.0                      | 50.8 $\pm$ 12.4                 | 0.460                 |
| PAsys (>50mmHg), n (%)                                        | 13 (9.8)                        | 11 (9.2)                             | 2 (16.7)                        | 0.695                 |
| Hospital stay (days), Mean $\pm$ SD                           | 10.0 $\pm$ 7.4                  | 9.5 $\pm$ 6.3                        | 15.8 $\pm$ 13.9                 | 0.147                 |

Values are mean  $\pm$  SD or n (%). Parameters are shown with *p*-values. BMI = Body mass index, CAD = Coronary artery disease, CCS = Canadian Cardiovascular Society, COPD = Chronic obstructive pulmonary disease, CVD = Cerebrovascular disease, CVE = Cerebrovascular event, DAPT = Dual antiplatelet therapy, GFR = Glomerular filtration rate, HR = High risk, LVEF = Left ventricular ejection fraction, NOAC = New oral anticoagulation, NYHA = New York Heart Association, OAC = Oral anticoagulation, PAD = Peripheral vascular disease, PAsys = Systolic pulmonary artery pressure, SAPT = Single antiplatelet therapy, STS = Society of Thoracic Surgeons.

**Table S3.** Patients' characteristics of the derivation cohort and the validation cohort.

|                                                               | All patients<br>(n=709) | Derivation<br>cohort<br>(n=577) | Validation<br>cohort<br>(n=132) | <i>p</i> -Value |
|---------------------------------------------------------------|-------------------------|---------------------------------|---------------------------------|-----------------|
| Age (years), Mean $\pm$ SD                                    | 81.7 $\pm$ 5.5          | 82.2 $\pm$ 5.2                  | 79.4 $\pm$ 6.7                  | <0.001***       |
| Female, n (%)                                                 | 393 (55.4)              | 325 (56.3)                      | 68 (51.5)                       | 0.316           |
| BMI (kg/m <sup>2</sup> ), Mean $\pm$ SD                       | 26.8 $\pm$ 5.0          | 26.9 $\pm$ 5.1                  | 26.5 $\pm$ 4.8                  | 0.410           |
| NYHA class III/IV,<br>n (%)                                   | 550 (77.6)              | 442 (76.6)                      | 108 (81.8)                      | 0.195           |
| CCS class III/IV, n (%)                                       | 103 (14.5)              | 97 (16.8)                       | 6 (4.5)                         | <0.001***       |
| Diabetes mellitus, n (%)                                      | 179 (25.2)              | 145 (25.1)                      | 34 (25.8)                       | 0.881           |
| COPD, n (%)                                                   | 214 (30.2)              | 173 (30.0)                      | 41 (31.1)                       | 0.808           |
| Arterial hypertension,<br>n (%)                               | 667 (94.1)              | 549 (95.1)                      | 118 (89.4)                      | 0.012*          |
| Atrial fibrillation, n (%)                                    | 238 (33.6)              | 188 (32.6)                      | 50 (37.9)                       | 0.245           |
| Pulmonary hypertension,<br>n (%)                              | 477 (67.3)              | 406 (70.4)                      | 71 (53.8)                       | <0.001***       |
| CAD, n (%)                                                    | 526 (74.2)              | 430 (74.5)                      | 96 (72.7)                       | 0.671           |
| PAD, n (%)                                                    | 213 (30.0)              | 183 (31.7)                      | 30 (22.7)                       | 0.042*          |
| CVD, n (%)                                                    | 126 (17.8)              | 105 (18.2)                      | 21 (15.9)                       | 0.535           |
| Prior CVE, n (%)                                              | 77 (10.9)               | 55 (9.9)                        | 22 (16.7)                       | 0.018*          |
| GFR (<50 mL/min),<br>n (%)                                    | 294 (41.5)              | 247 (42.8)                      | 47 (35.6)                       | 0.130           |
| EuroSCORE II (%),<br>Mean $\pm$ SD                            | 7.9 $\pm$ 7.9           | 8.2 $\pm$ 8.5                   | 5.4 $\pm$ 5.1                   | <0.001***       |
| STS score (%), Mean $\pm$ SD                                  | 7.0 $\pm$ 6.2           | 7.6 $\pm$ 6.9                   | 4.5 $\pm$ 3.1                   | <0.001***       |
| HR (log.ES $\geq$ 20%), n (%)                                 | 390 (55.0)              | 332 (57.5)                      | 58 (43.9)                       | 0.005**         |
| HAS-BLED Score,<br>Mean $\pm$ SD                              | 3.4 $\pm$ 0.9           | 3.5 $\pm$ 0.9                   | 2.7 $\pm$ 0.9                   | <0.001***       |
| CHA <sub>2</sub> DS <sub>2</sub> VASc Score,<br>Mean $\pm$ SD | 4.8 $\pm$ 1.2           | 4.8 $\pm$ 1.2                   | 4.7 $\pm$ 1.3                   | 0.400           |
| OAC, n (%)                                                    | 188 (26.5)              | 167 (28.9)                      | 21 (15.9)                       | 0.002**         |
| NOAC, n (%)                                                   | 90 (12.7)               | 56 (9.7)                        | 34 (25.8)                       | <0.001***       |
| SAPT, n (%)                                                   | 260 (36.7)              | 221 (38.3)                      | 39 (29.5)                       | 0.060           |
| DAPT, n (%)                                                   | 131 (18.5)              | 99 (17.2)                       | 32 (24.2)                       | 0.059           |
| LVEF (%), Mean $\pm$ SD                                       | 50.6 $\pm$ 13.7         | 50.0 $\pm$ 13.9                 | 53.4 $\pm$ 12.9                 | 0.010*          |

|                                     |                |                |                |        |
|-------------------------------------|----------------|----------------|----------------|--------|
| PAsys (>50mmHg), n (%)              | 64 (9.0)       | 51 (8.8)       | 13 (9.8)       | 0.715  |
| Hospital stay (days), Mean $\pm$ SD | 11.3 $\pm$ 8.0 | 11.6 $\pm$ 8.1 | 10.0 $\pm$ 7.4 | 0.040* |

Values are mean  $\pm$  SD or n (%). Parameters are shown with *p*-values (\**p*<0.05, \*\**p*<0.01, \*\*\**p*<0.001). BMI = Body mass index, CAD = Coronary artery disease, CCS = Canadian Cardiovascular Society, COPD = Chronic obstructive pulmonary disease, CVD = Cerebrovascular disease, CVE = Cerebrovascular event, DAPT = Dual antiplatelet therapy, GFR = Glomerular filtration rate, HR = High risk, LVEF = Left ventricular ejection fraction, NOAC = New oral anticoagulation, NYHA = New York Heart Association, OAC = Oral anticoagulation, PAD = Peripheral vascular disease, PAsys = Systolic pulmonal artery pressure, SAPT = Single antiplatelet therapy, STS = Society of Thoracic Surgeons.
